# Supplementary material for: Fabrication and characterization of electrospun nanofibers composed of decellularized meniscus extracellular matrix and polycaprolactone for meniscus tissue engineering
Source: Royal Society of Chemistry journal article supplement (doi:10.1039/c6tb03299k), 2017-01-01
Supplement: c6tb03299k1.pdf [file c6tb03299k1.pdf]

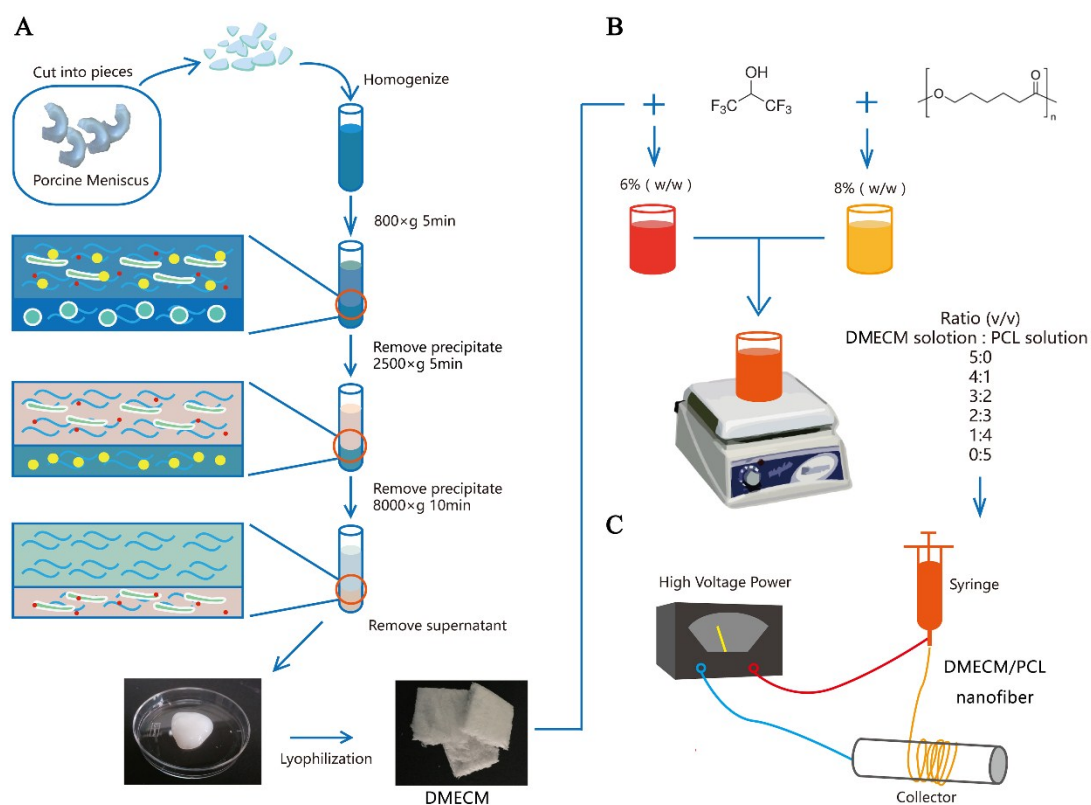

Sup. Fig 1. (A) Preparation of DMECM through a differential centrifugation method. (B) Preparation of DMECM/PCL solution in different ratio. (C) Electrospinning of DMECM/PCL nanofiber.
